# Supplementary material
Source: Springer Nature journal article supplement (https://www.springermedizin.de/resource/supplementary/12877_2006_66_MOESM1_ESM.pdf/9441134)
Supplement: MOESM1 [file 9441134]

**A**

| A. Activity of daily living (ADL)    |  | D. Mental functions                        |  |
|--------------------------------------|--|--------------------------------------------|--|
| 1. Eating                            |  | 1. Memory                                  |  |
| 2. Bathing                           |  | 2. Orientation                             |  |
| 3. Dressing                          |  | 3. Understanding                           |  |
| 4. Grooming                          |  | 4. Judgement                               |  |
| 5. Urinary continence                |  | 5. Behavior                                |  |
| 6. Faecal continence                 |  |                                            |  |
| 7. Using the bathroom                |  |                                            |  |
| B. Mobility                          |  | E. Instrumental activities of daily living |  |
| 1. Transfers                         |  | 1. Cleaning the house                      |  |
| 2. Walking inside                    |  | 2. Preparing meals                         |  |
| 3. Walking outside                   |  | 3. Shopping                                |  |
| 4. Putting on prosthesis or orthosis |  | 4. Doing the laundry                       |  |
| 5. Moving around in a wheelchair     |  | 5. Using the phone                         |  |
| 6. Using the stairs                  |  | 6. Using public transportation             |  |
|                                      |  | 7. Taking medication                       |  |
| C. Communication                     |  | 8. Managing the budget                     |  |
| 1. Seeing                            |  |                                            |  |
| 2. Hearing                           |  |                                            |  |
| 3. Talking                           |  |                                            |  |

**B**

| DISABILITIES                                                                                                                                                                                        | RESOURCES                                                                                                        | HANDICAP                    | STABILITY*                                                                                                              |
|-----------------------------------------------------------------------------------------------------------------------------------------------------------------------------------------------------|------------------------------------------------------------------------------------------------------------------|-----------------------------|-------------------------------------------------------------------------------------------------------------------------|
|                                                                                                                                                                                                     | 0. Subject himself<br>1. Family                                                                                  | 2. Neighbour<br>3. Employee | 4. Aides<br>5. Nurse                                                                                                    |
|                                                                                                                                                                                                     | 6. Volunteer<br>7. Other                                                                                         |                             |                                                                                                                         |
| A. ACTIVITIES OF DAILY LIVING (ADL)                                                                                                                                                                 |                                                                                                                  |                             |                                                                                                                         |
| <b>1. EATING</b>                                                                                                                                                                                    |                                                                                                                  |                             |                                                                                                                         |
| <input type="checkbox"/> 0 Feeds self independently<br><input type="checkbox"/> -0.5 With difficulty                                                                                                |                                                                                                                  |                             |                                                                                                                         |
| <input type="checkbox"/> -1 Feeds self but needs stimulation or supervision<br>OR food must be prepared or cut or pureed first                                                                      | Does the subject presently have the human resources (help or supervision) necessary to overcome this disability? |                             | <input type="checkbox"/> 0<br><input type="checkbox"/> -1<br><input type="checkbox"/> -2<br><input type="checkbox"/> -3 |
| <input type="checkbox"/> -2 Needs some help to eat<br>OR dishes must be presented one after another                                                                                                 | <input type="checkbox"/> Yes<br><input type="checkbox"/> No                                                      |                             | <input type="checkbox"/> -<br><input type="checkbox"/> +<br><input type="checkbox"/> •                                  |
| <input type="checkbox"/> -3 Must be fed totally by another person<br>OR has a naso-gastric tube or a gastrostomy<br><input type="checkbox"/> naso-gastric tube <input type="checkbox"/> gastrostomy | Resources: <input type="checkbox"/> <input type="checkbox"/> <input type="checkbox"/>                            |                             |                                                                                                                         |
